# Supplementary material
Source: PubMed Central journal article supplement (PMC2818019)
Supplement: NIHMS127049-supplement-1.pdf [file NIHMS127049-supplement-1.pdf]

## **Expanded Materials and Methods section**

### **Antibodies and reagents**

Monoclonal antibody against VE-cadherin and peroxidase-conjugated immunoglobulins to mouse or rabbit IgG were obtained from Santa Cruz Biotechnology, Inc. ADAM10 was detected using a polyclonal antiserum from Calbiochem.  $\beta$ -Tubulin antibody (E7) was from DSHB (University of Iowa). Goat anti-mouse IgG conjugated to Alexa Fluor 594 was from Molecular Probes. The  $\gamma$ -secretase inhibitors DAPT (N-[N-(3,5-difluorophenacetyl)-L-alanyl]-L-(S)-phenylglycine t-butyl ester) and inhibitor X (L-685,458) were purchased from Calbiochem. TAPI, GM6001, CF109203X, GÖ6976, APMA (aminophenylmercuric acetate), Ionomycin, staurosporine and thrombin (from human plasma) were obtained from Sigma. Hydroxamate-based inhibitors GI254023 and GW280264 were described elsewhere.<sup>1</sup> Recombinant human VE-cadherin and ADAM10 were obtained from R&D Systems.

### **Cell culture and transfection**

HUVECs were obtained from Provitro and cultured in Endothelial Cell Growth Medium from PromoCell. All experiments were performed with HUVECs from passages 2-4. COS-7 cells were grown in DMEM (high glucose) supplemented with 10% fetal calf serum and 1% penicillin/streptomycin (PAA Laboratories). Murine VE-cadherin in pcDNA3.1 vector, kindly provided by D. Vestweber, was fused with C-terminally hemagglutinin (HA)-tag. COS-7 cells were transfected in six-well tissue culture plates using FuGENE 6 (Roche) according to the manufacturer's instructions. HUVECs were transfected with jet PEI<sup>TM</sup>-HUVEC transfection reagent from Polyplus transfection (Hamburg, Germany) according to manufacturer's instructions.

**siRNA transfection**

Inhibition of ADAM10 expression was performed using the following RNAi oligonucleotides (Stealth™ RNAi, Invitrogen): HSS100165, HSS100166, HSS100167. Unspecific RNAi (Stealth™ RNAi Negative Control LO GC, Invitrogen) with low GC content was used as a negative control. HUVECs were transfected with a total of 40 pmol of an equimolar mixture of the three constructs. Cells were seeded on transwell filters 4 hours after transfection. The cells were harvested for immunoblot analysis after 48 hours. For downregulation of ADAM10 in human T cells (PHA blasts)  $5 \times 10^6$  cells were transfected with a total of 150 pMol of an equimolar mixture of the three constructs, using the AMAXA electroporation system according to manufacturers` instructions. After 6 hours of incubation the medium was replaced. T cells were seeded on top of the HUVECs 24h after transfection.

**Immunocytochemistry**

HUVECs were grown to confluence on collagen-coated glass coverslips. Cells were incubated in serum-free RPMI with stimuli for different time points. Cells were fixed and permeabilised with methanol at  $-20^{\circ}\text{C}$  for 10 min. After washing with PBS, cells were blocked with 3% BSA in PBS for 45 min and incubated with primary antibody for 1 hour at room temperature. Following washing with PBS, cells were incubated with secondary antibodies (goat anti-mouse IgG Alexa Fluor 594) for 1h.

**Statistical analysis**

All values are expressed as mean of triplicates  $\pm$  S.D. or as mean  $\pm$  standard error of the mean (SEM). The SEM values indicate the variation between mean values obtained from at least three independent experiments. The assumptions for normality (Kolmogorov-Smirnov test) and equal variance (Levene median test) were verified with the SigmaStat 3.1 software

(Erkrath, SYSSTAT, Germany). The analysis of variance were performed with one-way ANOVA. Multiple parametric statistical comparisons between experimental groups versus a control group were accomplished with Dunnett's method. All pairwise multiple comparison procedures were performed with Tukey's test. p-values < 0.05 were classified as statistically significant.

### **Supplementary Figure Legends**

**Supplementary Figure 1. Dose-dependent decrease of VE-cadherin proteolysis.** HUVECs were treated with DMSO or different concentrations of ADAM10 inhibitor (GI254023X). Cell pellets were analyzed for VE-cadherin CTF generation by immunoblot. Tubulin was used as loading control.

**Supplementary Figure 2. Densitometric analysis of ADAM10 siRNA transfection and VE-cadherin proteolysis in HUVECs.** Cell pellets of untransfected, mock-transfected or ADAM10 siRNA-transfected HUVECs were harvested 48 hours after transfection and analyzed for ADAM10 expression and for VE-cadherin CTF generation by immunoblot. Total ADAM10 expression and VE-cadherin CTF generation of 4 different experiments was quantified by densitometric analysis. ADAM10 siRNA transfection significantly decreased ADAM10 expression and VE-cadherin shedding. \* $P < 0.05$  ADAM10 siRNA vs control siRNA treated cells).

**Supplementary Figure 3. VE-cadherin proteolysis is ADAM10-dependent.** (A) HUVECs were pretreated with DMSO or ADAM10 inhibitor GI254023X (10  $\mu$ M) for 30 min. Then, cells were stimulated with APMA (100  $\mu$ M), a potent activator of MMPs and ADAMs, for 30 min. Cell pellets were analyzed for VE-cadherin CTF generation by immunoblotting (upper panel). CTF generation was calculated as percentage of total VE-cadherin by densitometric analysis (right panel). Data are expressed as mean $\pm$ SEM; n=4 independent experiments. \* $P$ <0.05 DMSO+APMA vs DMSO, ° $P$ <0.05 GI+APMA vs DMSO+APMA treated cells. HUVECs were transiently transfected with control siRNA or hADAM10 siRNA (lower panel). 48 hours after transfection cells were stimulated with APMA (100  $\mu$ M), for 30 min. Cell pellets were analyzed for VE-cadherin CTF generation and ADAM10 expression by immunoblotting. p: precursor of ADAM10; m: mature form of ADAM10. Tubulin was used as loading control.

B) Recombinant VE-cadherin is cleaved by ADAM10 in vitro. Recombinant VE-cadherin (1 mg, R & D Systems) was incubated with recombinant ADAM10 (100 ng, R & D Systems) in reaction buffer (25 mM Tris/0.005% Brij-35/2.5 mM ZnCl<sub>2</sub>, pH 8.8) at 37°C (10 ml per sample). Before starting the reaction, a 10- $\mu$ l sample was taken, representing the intact VE-cadherin. At the indicated time points, samples were taken and immediately mixed with Laemmli buffer and analyzed by SDS/PAGE under reducing conditions. ADAM10 and VE-cadherin were analyzed by immunoblot with anti-HIS-antibodies.

**Supplementary Figure 4. PKC inhibition does not influence VE-cadherin proteolysis.**

HUVECs were incubated with PKC inhibitor CF109203X (5  $\mu$ M) and GÖ6976 (1  $\mu$ M) overnight in the presence of  $\gamma$ -secretase inhibitor X (1  $\mu$ M). Cells were lysed and analyzed by immunoblot using anti-VE-cadherin antibody. Tubulin was used as loading control.

**Supplementary Figure 5. Ionomycin and Thrombin induce ADAM10-dependent VE-cadherin shedding.** HUVECs were transiently transfected with control siRNA or hADAM10 siRNA. 48 h after transfection cells were treated with A) ionomycin (IO, 10  $\mu$ M) or with B) thrombin (1 U/ml) for 30 min in the presence of the  $\gamma$ -secretase inhibitor X (1  $\mu$ M). Cells were analysed for VE-cadherin CTF generation and ADAM10 expression by immunoblotting. Tubulin was used as loading control.

#### REFERENCE

1. Ludwig A, Hundhausen C, Lambert MH, Broadway N, Andrews RC, Bickett DM, Leesnitzer MA, Becherer JD. Metalloproteinase inhibitors for the disintegrin-like metalloproteinases ADAM10 and ADAM17 that differentially block constitutive and phorbol ester-inducible shedding of cell surface molecules. *Comb Chem High Throughput Screen.* 2005;8:161-171.

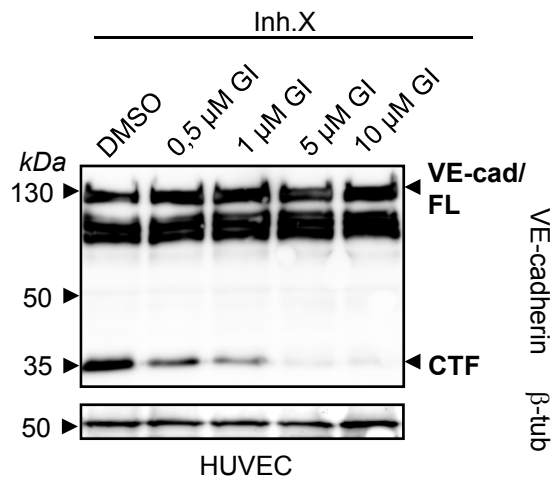

*Supplementary Figure 1*

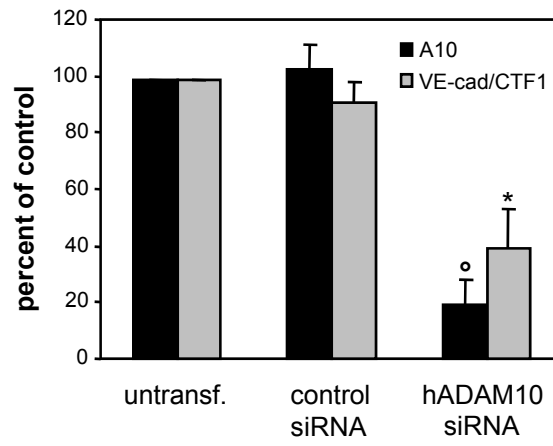

*Supplementary Figure 2*

**A**

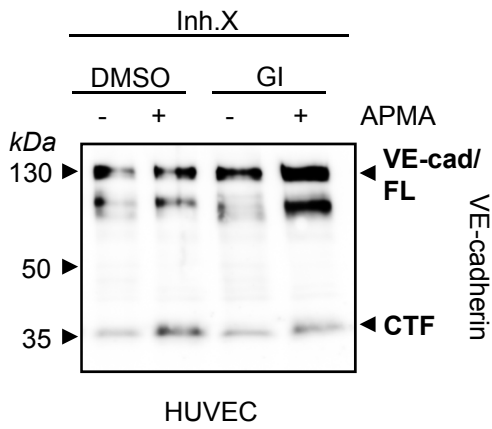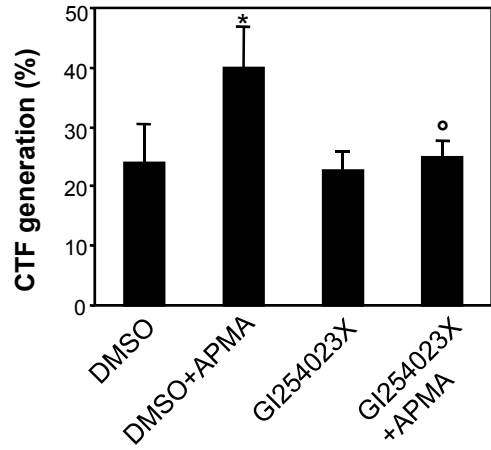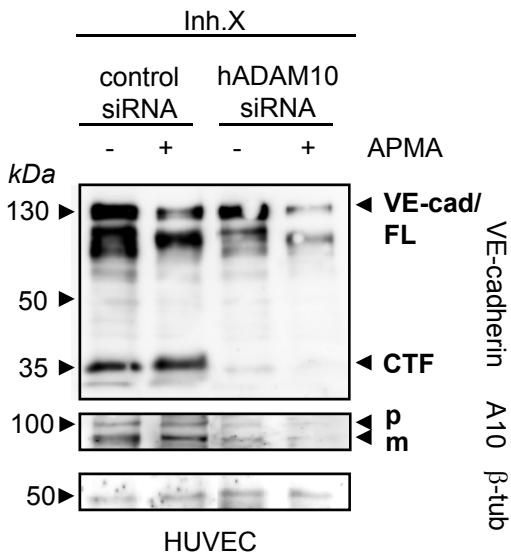

**B**

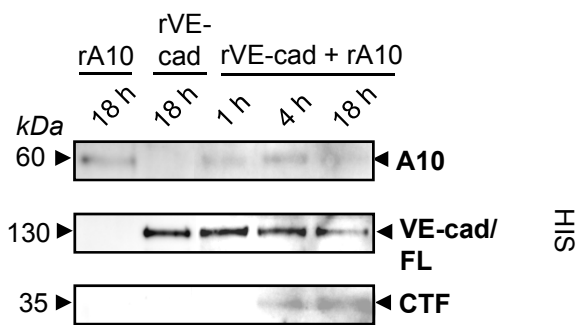

*Supplementary Figure 3*



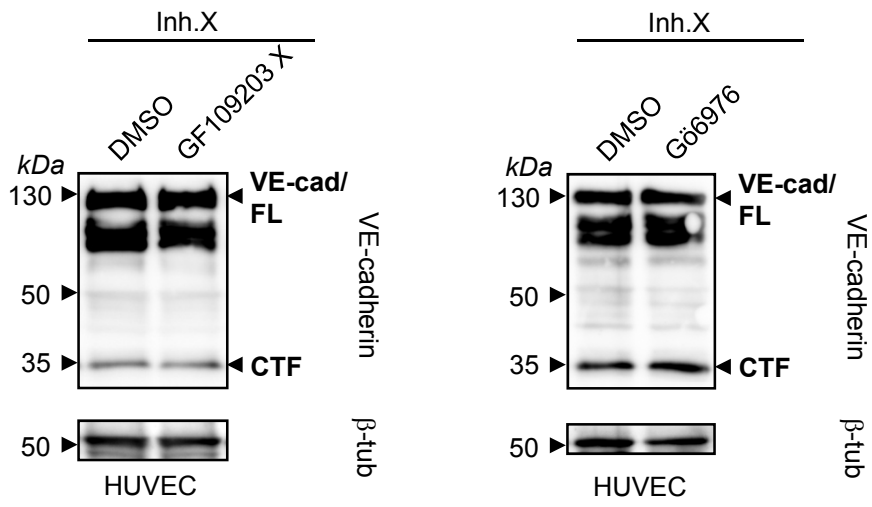

*Supplementary Figure 4*

**A**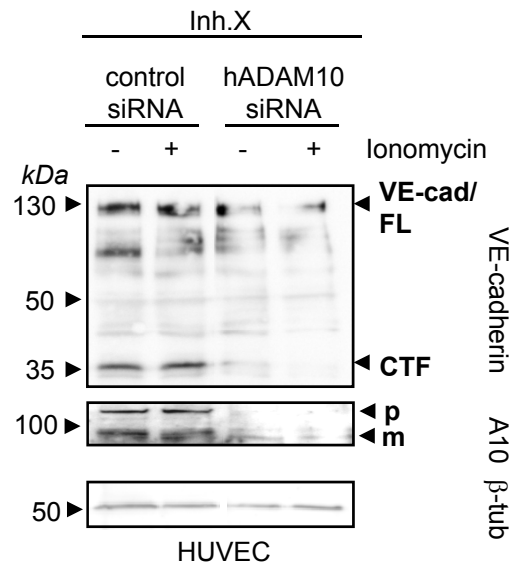**B**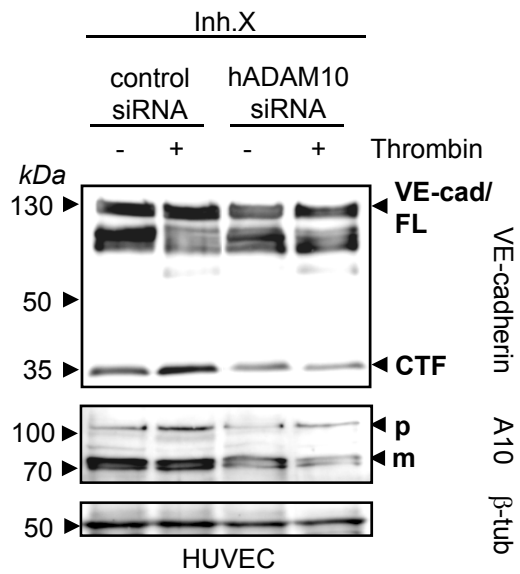

*Supplementary Figure 5*
